# Supplementary material for: Semi-natural habitat, ecotones and landscape-scale management enhance the occupancy, richness and fitness of cavity-nesting Hymenoptera
Source: Research Square preprint supplement (doi:10.21203/rs.3.rs-6514304/v1), 2025-08-11
Supplement: Supplementary file 1 [file 575f84331a67b31dc528db4a.docx]

**Supplementary Information (SI)**

**Semi-natural habitat, ecotones and landscape-scale management enhance the occupancy, richness and fitness of cavity-nesting Hymenoptera**

Christopher Wild1,2*, Julia Zelychenko1, Sebastian Hopfenmüller3, Robert J. Paxton1,4, Panagiotis Theodorou1,4

1 General Zoology, Institute for Biology, Martin-Luther-University Halle-Wittenberg, Hoher Weg 8, 06120 Halle (Saale), Germany

2Naturkundemuseum Erfurt, Große Arche 14, 99084 Erfurt, Germany

3 Stiftung KulturLandschaft Günztal, Bahnhofstraße 38, 87724 Ottobeuren, Germany

4 German Centre for Integrative Biodiversity Research (iDiv) Halle-Jena-Leipzig, Deutscher Platz 5e, 04103 Leipzig, Germany

* Correspondence:

Christopher Wild, General Zoology, Institute for Biology, Martin Luther-University Halle-Wittenberg, Hoher Weg 8, 06120 Halle (Saale), Germany

Email: christopher_wild@hotmail.de


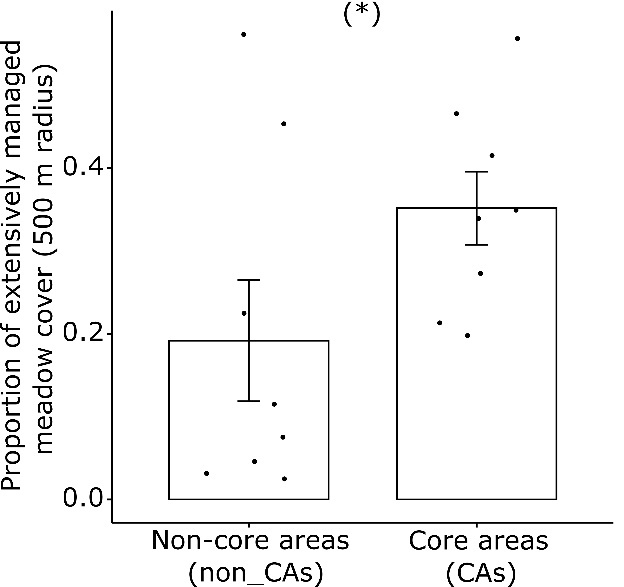


**Fig. S1** Proportion of extensively managed meadow land cover (mean ± SE) in non-CAs versus CAs. *, P < 0.05.

**Table S1** GPS-coordinates of all trap-nests.

| Trap-Nest | Location | Site-Pair | Time of placing | Latitude | Longitude |
| --- | --- | --- | --- | --- | --- |
| H1I T1 | H1I | H1 | 24.03.2021 16:25 | 48.3230821283928 | 10.3160982251003 |
| H1I T2 | H1I | H1 | 24.03.2021 16:48 | 48.3233292524339 | 10.3162408729747 |
| H1I T3 | H1I | H1 | 24.03.2021 16:59 | 48.3237390201521 | 10.3175873448876 |
| H1O T1 | H1O | H1 | 30.03.2021 10:10 | 48.3507485243307 | 10.3066822142654 |
| H1O T2 | H1O | H1 | 30.03.2021 10:20 | 48.3499051503641 | 10.3050377410083 |
| H1O T3 | H1O | H1 | 30.03.2021 10:32 | 48.3492561750284 | 10.3059480485305 |
| H2I T1 | H2I | H2 | 22.03.2021 12:18 | 48.0709094497164 | 10.3401177425980 |
| H2I T2 | H2I | H2 | 22.03.2021 12:25 | 48.0721625657346 | 10.3383367732532 |
| H2I T3 | H2I | H2 | 22.03.2021 12:45 | 48.0717425103669 | 10.3376480640443 |
| H2O T1 | H2O | H2 | 23.03.2021 13:21 | 48.0356771202302 | 10.3188314005408 |
| H2O T2 | H2O | H2 | 23.03.2021 13:31 | 48.0363731701695 | 10.3187738178719 |
| H2O T3 | H2O | H2 | 23.03.2021 13:46 | 48.0366832203484 | 10.3173776750277 |
| H3I T1 | H3I | H3 | 23.03.2021 15:28 | 47.9880284626542 | 10.2871013884515 |
| H3I T2 | H3I | H3 | 23.03.2021 15:37 | 47.9881854080233 | 10.2860687691538 |
| H3I T3 | H3I | H3 | 23.03.2021 15:50 | 47.9873160405214 | 10.2858670690528 |
| H3O T1 | H3O | H3 | 23.03.2021 12:31 | 47.9917787726647 | 10.3815315823202 |
| H3O T2 | H3O | H3 | 23.03.2021 12:40 | 47.9913722859433 | 10.3810130247755 |
| H3O T3 | H3O | H3 | 23.03.2021 12:52 | 47.9908475372444 | 10.3808301339808 |
| H4I T1 | H4I | H4 | 23.03.2021 09:28 | 47.8960477743681 | 10.3614371353076 |
| H4I T2 | H4I | H4 | 23.03.2021 09:39 | 47.8967408452515 | 10.3604278840798 |
| H4I T3 | H4I | H4 | 23.03.2021 09:50 | 47.8975081707620 | 10.3599218185717 |
| H4O T1 | H4O | H4 | 23.03.2021 11:32 | 47.9320976399016 | 10.3637071152315 |
| H4O T2 | H4O | H4 | 23.03.2021 11:44 | 47.9305610582670 | 10.3654923021213 |
| H4O T3 | H4O | H4 | 23.03.2021 11:52 | 47.9299956945954 | 10.3668903667760 |
| H5I T1 | H5I | H5 | 22.03.2021 16:49 | 47.8848393990972 | 10.4098610762218 |
| H5I T2 | H5I | H5 | 22.03.2021 16:58 | 47.8836116866409 | 10.4112865192842 |
| H5I T3 | H5I | H5 | 22.03.2021 17:10 | 47.8834209097968 | 10.4089814593453 |
| H5O T1 | H5O | H5 | 23.03.2021 10:47 | 47.9047139205261 | 10.3944773652511 |
| H5O T2 | H5O | H5 | 23.03.2021 10:52 | 47.9041715712872 | 10.3939516657267 |
| H5O T3 | H5O | H5 | 23.03.2021 11:10 | 47.9066278358920 | 10.3924508324410 |
| H6I T1 | H6I | H6 | 22.03.2021 16:01 | 47.8615972712599 | 10.4079999919182 |
| H6I T2 | H6I | H6 | 22.03.2021 16:10 | 47.8624236567384 | 10.4080683534411 |
| H6I T3 | H6I | H6 | 22.03.2021 16:18 | 47.8629789798988 | 10.4078614035679 |
| H6O T1 | H6O | H6 | 22.03.2021 14:59 | 47.8266601394871 | 10.4153081579061 |
| H6O T2 | H6O | H6 | 22.03.2021 15:10 | 47.8266354115619 | 10.4159587798402 |
| H6O T3 | H6O | H6 | 22.03.2021 15:25 | 47.8260925681314 | 10.4172254855638 |
| H7I T1 | H7I | H7 | 24.03.2021 11:54 | 48.2164251175668 | 10.2752984308033 |
| H7I T2 | H7I | H7 | 24.03.2021 12:09 | 48.2167454128582 | 10.2749709126078 |
| H7I T3 | H7I | H7 | 24.03.2021 12:23 | 48.2164851652548 | 10.2741440633237 |
| H7O T1 | H7O | H7 | 24.03.2021 13:23 | 48.1985846835334 | 10.3242072672127 |
| H7O T2 | H7O | H7 | 24.03.2021 13:42 | 48.1990396122774 | 10.3256731502007 |
| H7O T3 | H7O | H7 | 24.03.2021 13:57 | 48.1981018145176 | 10.3267130692038 |
| H8I T1 | H8I | H8 | 24.03.2021 10:43 | 48.1899344440717 | 10.2432923275826 |
| H8I T2 | H8I | H8 | 24.03.2021 10:53 | 48.1903147787427 | 10.2425238141186 |
| H8I T3 | H8I | H8 | 24.03.2021 11:12 | 48.1887814699880 | 10.2417879272440 |
| H8O T1 | H8O | H8 | 24.03.2021 14:39 | 48.1739872803792 | 10.3365761006812 |
| H8O T2 | H8O | H8 | 24.03.2021 14:50 | 48.1734638139296 | 10.3367172138537 |
| H8O T3 | H8O | H8 | 24.03.2021 15:03 | 48.1714931554788 | 10.3370162451990 |

**Supplementary methods S1**

*DNA-extraction and species identification through barcoding*

DNA was extracted from larvae using a Qiagen DNeasy Blood & Tissue Kit following the manufacturer’s recommendations while a Chelex (5%) extraction protocol was used for adult individuals. For Chelex DNA extraction, two mid-legs per sample were transferred into PCR plates with 100 µl of 5% Chelex solution and 5 µl of proteinase K (20 mg/ml). The PCR-plates were processed on a thermocycler (Biometra, Göttingen, Germany) using the following programme: 1h at 55 °C; 15 min at 99 °C; 1min at 37 °C and 15 min at 99 °C. Extracted DNA samples were stored at -20 ° C.

The ca. 650 bp region of the mitochondrial cytochrome c oxidase subunit I (COI) gene was amplified using the DNA extracts with the primers LCO-1490 (5'-GGTCAACAAATCATAAAGATATTGG-3') and HCO-2198 (5'- TAAACTTCAGGGTGACCAAAAAATCA-3') (Folmer et al., 1994). PCR reactions were carried out in 10 µL volumes consisting of 1 x PCR buffer containing 1.5 mM MgCl2 (Promega, Madison, WI, USA), 200 µM of each dNTP, 0.4 µM of each primer, 1.5 U Taq-Polymerase (Promega) and 2 µL of template DNA (approximately 25-50 ng). PCRs were performed with a thermocycler (Biometra, Göttingen, Germany) using the following thermal regime: 3 min at 94 °C, followed by 35 cycles of 30 s at 94 °C, 45 s annealing at 50 °C and 1 min elongation at 72°C, then a final elongation step at 72 °C for 8 min.

PCR products were screened using agarose gel electrophoresis to confirm amplification of correct fragment size. The ExoSAP-IT PCR Product Cleanup kit (Affymetrix, Santa Clara, CA, USA; Bell, 2008) was used to purify PCR products and samples were Sanger sequenced with the forward primer (LCO-1490). Sequence reads were checked and trimmed using Geneious v.7.1.9. Trimmed sequences were BLASTed against the NCBI (GenBank) nucleotide database using a threshold of at least 98% identity for species identification. Additionally, the Barcode of Life (BOLD) database (Ratnasingham & Hebert, 2007) was used to confirm species identification.


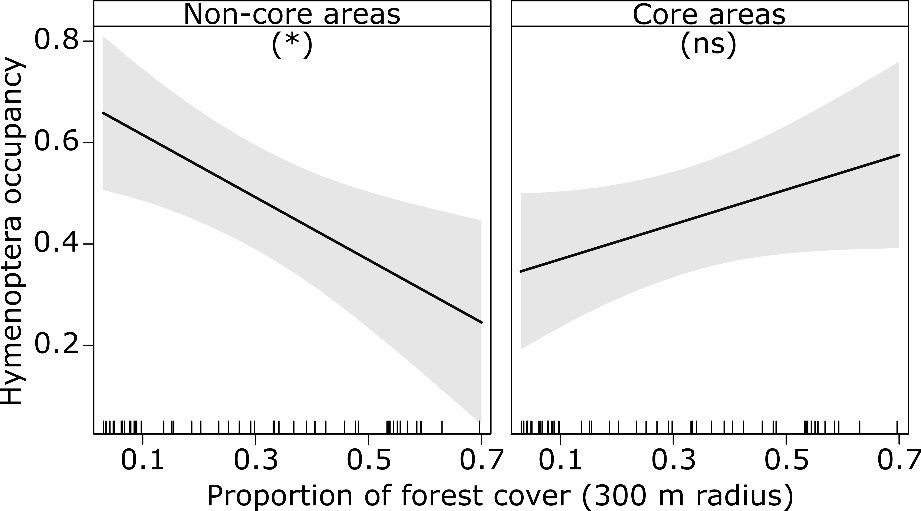


**Fig. S2** Relationships between Hymenoptera occupancy (proportion of occupied stems) and the proportion of forest cover at the 300 m radius in non-CAs and CAs. Plotted lines show the predicted relationship and shaded areas indicate the 95% confidence intervals. *, P < 0.05; ns, not-significant.

**Table S2** ANOVA table of the effect of CAs versus non-CAs, proportion of forest cover, edge density, and their interaction with CA/non-CA status on Hymenoptera occupancy, wild bee species richness, and wasp species richness.

|  | F-value | P-value | Effect size (partial *η*2) |
| --- | --- | --- | --- |
| *Hymenoptera occupancy* |  |  |  |
| Core area vs non-core area | 0.866 | 0.357 | 0.17 |
| Proportion of forest cover | 0.804 | 0.376 | 0.42 |
| Edge density | 0.033 | 0.856 | 0.21 |
| Core area vs non-core area: Proportion of forest cover | 12.318 | 0.001** | 0.59 |
| Core area vs non-core area: Edge density | 5.963 | 0.018* | 0.36 |
| *Bee species richness* |  |  |  |
| Core area vs non-core area | 0.577 | 0.451 | 0.12 |
| Proportion of forest cover | 1.760 | 0.194 | 0.04 |
| Edge density | 0.033 | 0.855 | 0.10 |
| Core area vs non-core area: Proportion of forest cover | 0.087 | 0.768 | 0.009 |
| Core area vs non-core area: Edge density | 2.996 | 0.091 | 0.21 |
| *Wasp species richness* |  |  |  |
| Core area vs non-core area | 11.716 | 0.001** | 0.71 |
| Proportion of forest cover | 0.419 | 0.524 | 0.11 |
| Edge density | 0.449 | 0.509 | 0.03 |
| Core area vs non-core area: proportion of forest cover | 7.819 | 0.008** | 0.37 |
| Core area vs non-core area: edge density | 0.063 | 0.803 | 0.003 |


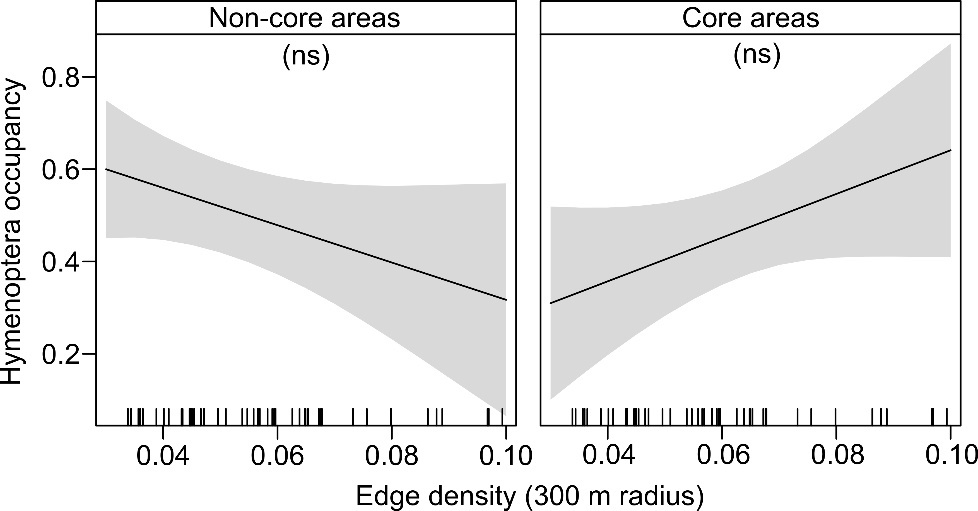


**Fig. S3** Relationships between Hymenoptera occupancy (proportion of occupied stems) and edge density at the 300 m scale in non-CAs and CAs. Plotted lines show the predicted relationship and shaded areas indicate the 95% confidence intervals. ns, not-significant.


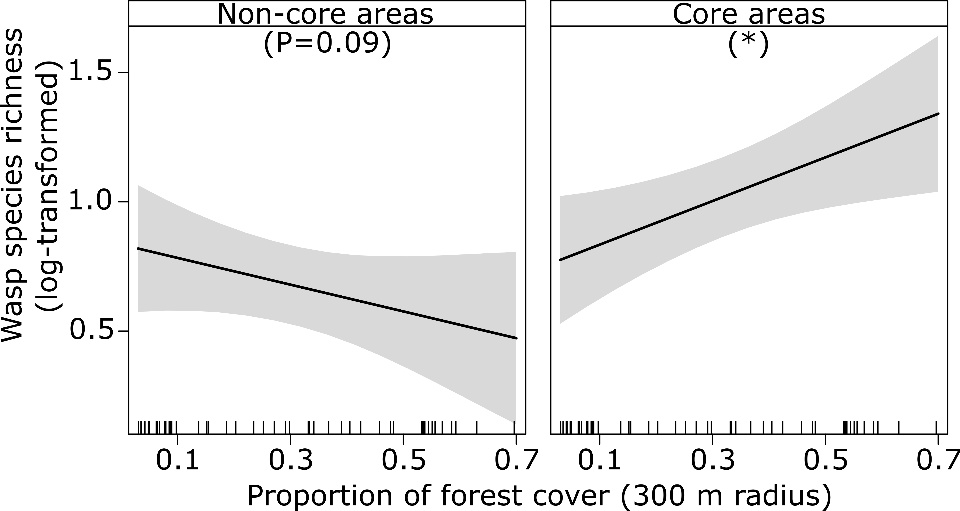


**Fig. S4** Relationships between wasp species richness and the proportion of forest cover at the 300 m radius in non-CAs and CAs. Plotted lines show the predicted relationship and shaded areas indicate the 95% confidence intervals. *, P < 0.05.


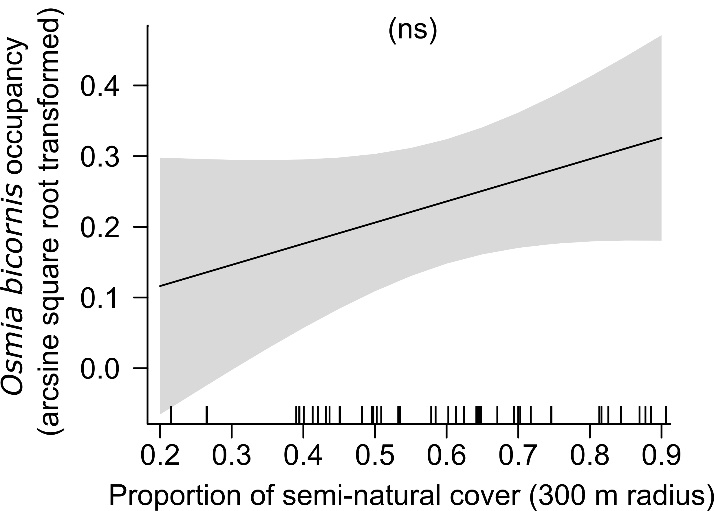


**Fig. S5** Relationship between *Osmia bicornis* occupancy (proportion of occupied stems) and proportion of semi-natural land cover at the 300 m radius. Plotted line shows the predicted relationships and shaded areas indicate the 95% confidence intervals; ns, not-significant.


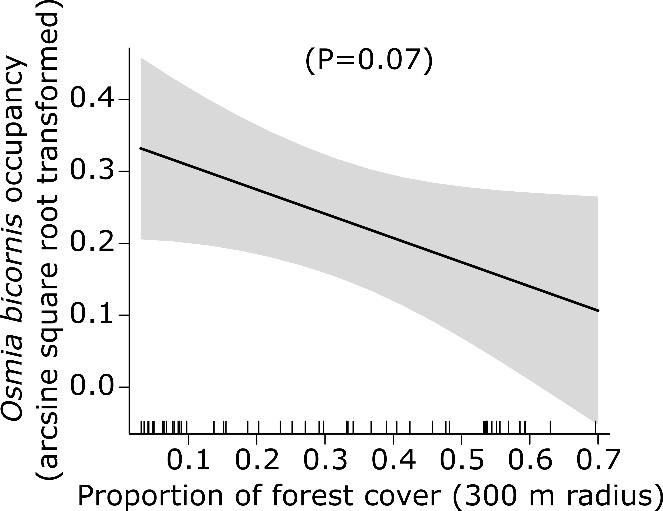


**Fig. S6** Relationship between *Osmia bicornis* occupancy (proportion of occupied stems) and the proportion of forest cover at the 300 m radius. Plotted line shows the predicted relationship and shaded areas indicate the 95% confidence intervals.

**Table S3** ANOVA table of the effect of CAs versus non-CAs, proportion of forest cover, edge density, and their interaction with CA/non-CA status on *Osmia bicornis* occupancy, brood cells per stem, number of female and male offspring, and survival.

|  | F-value | P-value | Effect size (partial *η*2) |
| --- | --- | --- | --- |
| Osmia bicornis *occupancy* |  |  |  |
| Core area vs non-core area | 0.0004 | 0.984 | 0.00009 |
| Proportion of forest cover | 3.815 | 0.073 | 0.27 |
| Edge density | 0.105 | 0.750 | 0.02 |
| Core area vs non-core area: proportion of forest cover | 2.900 | 0.126 | 0.19 |
| Core area vs non-core area: edge density | 0.978 | 0.344 | 0.06 |
| Osmia bicornis *brood cells per stem* |  |  |  |
| Core area vs non-core area | 0.562 | 0.457 | 0.10 |
| Proportion of forest cover | 6.906 | 0.011* | 0.27 |
| Edge density | 0.016 | 0.899 | 0.009 |
| Core area vs non-core area: proportion of forest cover | 1.245 | 0.270 | 0.07 |
| Core area vs non-core area: edge density | 0.418 | 0.521 | 0.02 |
| Osmia bicornis *number of female offspring* |  |  |  |
| Core area vs non-core area | 1.400 | 0.243 | 0.22 |
| Proportion of forest cover | 4.809 | 0.033* | 0.21 |
| Edge density | 0.400 | 0.530 | 0.003 |
| Core area vs non-core area: proportion of forest cover | 1.066 | 0.307 | 0.06 |
| Core area vs non-core area: edge density | 0.097 | 0.756 | 0.005 |
| Osmia bicornis *number of male offspring* |  |  |  |
| Core area vs non-core area | 0.237 | 0.668 | 0.05 |
| Proportion of forest cover | 5.784 | 0.040* | 0.31 |
| Edge density | 0.040 | 0.843 | 0.005 |
| Core area vs non-core area: proportion of forest cover | 3.133 | 0.107 | 0.17 |
| Core area vs non-core area: edge density | 0.388 | 0.544 | 0.02 |
| Osmia bicornis *survival* | |  |  |  |
| Core area vs non-core area | | 1.711 | 0.206 | 0.32 |
| Proportion of forest cover | | 0.008 | 0.929 | 0.002 |
| Edge density | | 4.832 | 0.040* | 0.38 |
| Core area vs non-core area: proportion of forest cover | | 0.248 | 0.623 | 0.01 |
| Core area vs non-core area: edge density | | 1.100 | 0.307 | 0.07 |
|  |  |  |  |


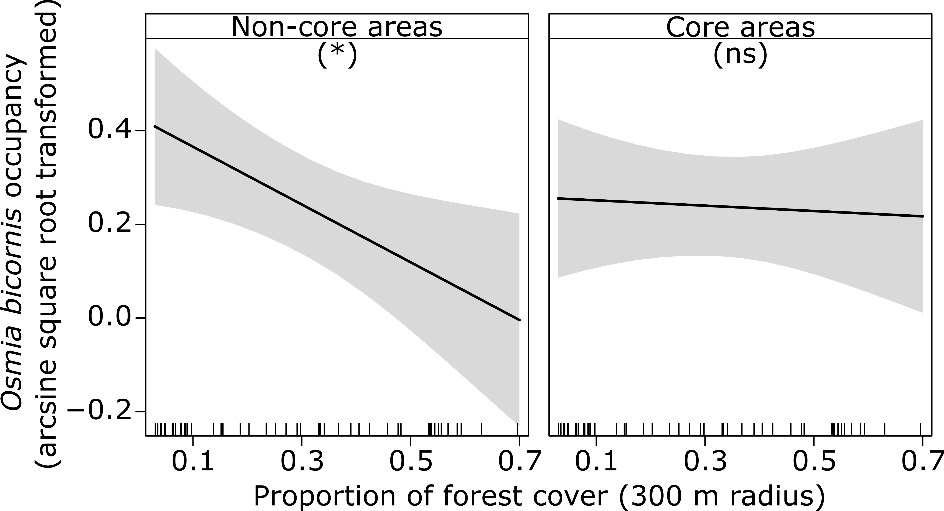


**Fig. S7** Relationships between *Osmia bicornis* occupancy (proportion of occupied stems) and the proportion of forest cover at the 300 m radius in non-CAs and CAs. Plotted lines show the predicted relationship and shaded areas indicate the 95% confidence intervals. *, P < 0.05; ns, not-significant.


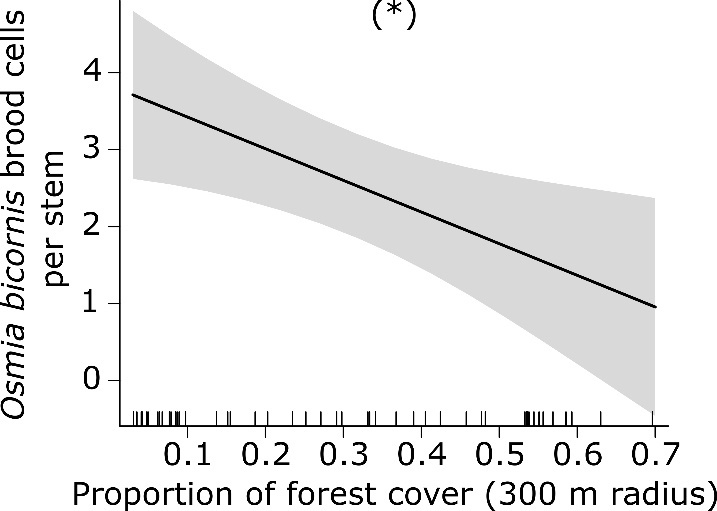


**Fig. S8** Relationship between *Osmia bicornis* number of brood cells per stem and the proportion of forest cover at the 300 m radius. Plotted line shows the predicted relationship and shaded areas indicate the 95% confidence intervals. *, P < 0.05.


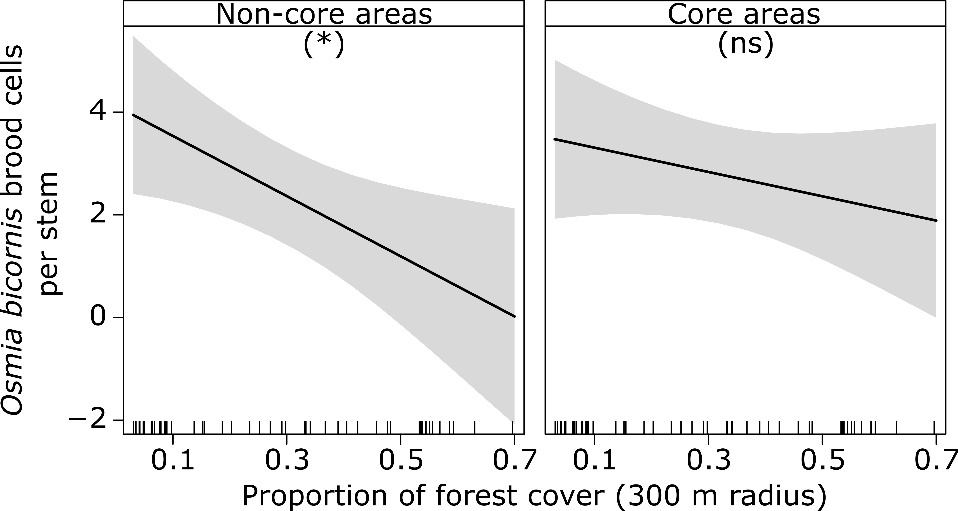


**Fig. S9** Relationships between number of *Osmia bicornis* brood cells per stem and the proportion of forest cover at the 300 m radius in non-CAs and CAs. Plotted lines show the predicted relationship and shaded areas indicate the 95% confidence intervals. *, P < 0.05; ns, not-significant.


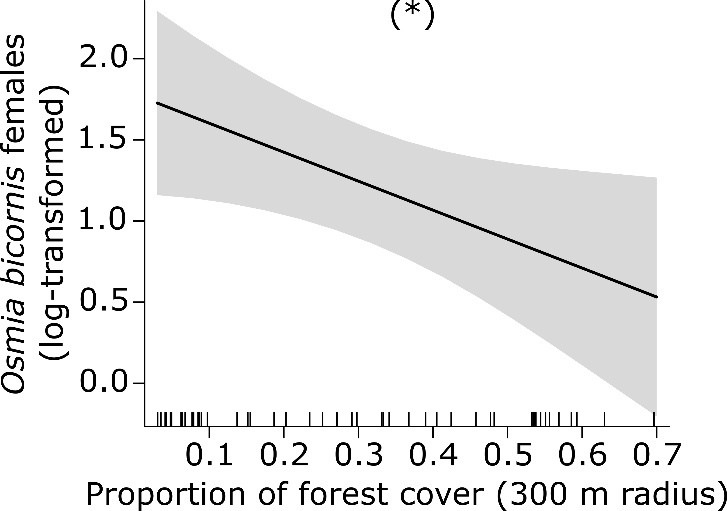


**Fig. S10** Relationship between the number of *Osmia bicornis* female offspring and the proportion of forest cover at the 300 m radius. Plotted line shows the predicted relationship and shaded areas indicate the 95% confidence intervals. *, P < 0.05.


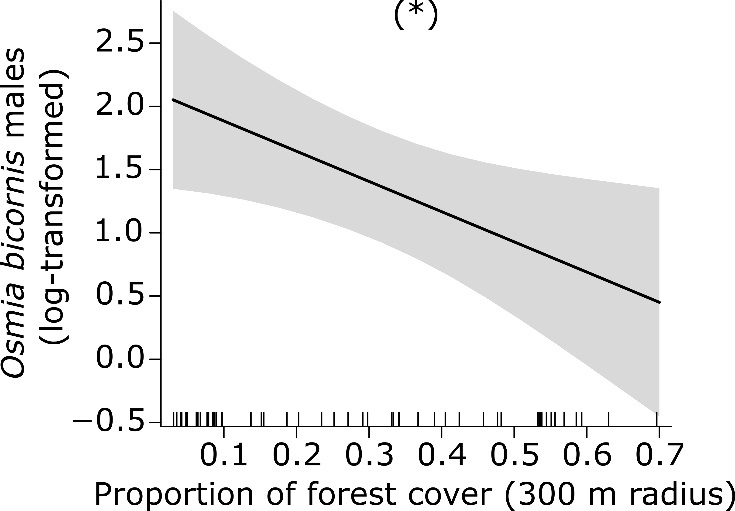


**Fig. S11** Relationship between the number of *Osmia bicornis* male offspring and the proportion of forest cover at the 300 m radius. Plotted line shows the predicted relationship and shaded areas indicate the 95% confidence intervals. *, P < 0.05.


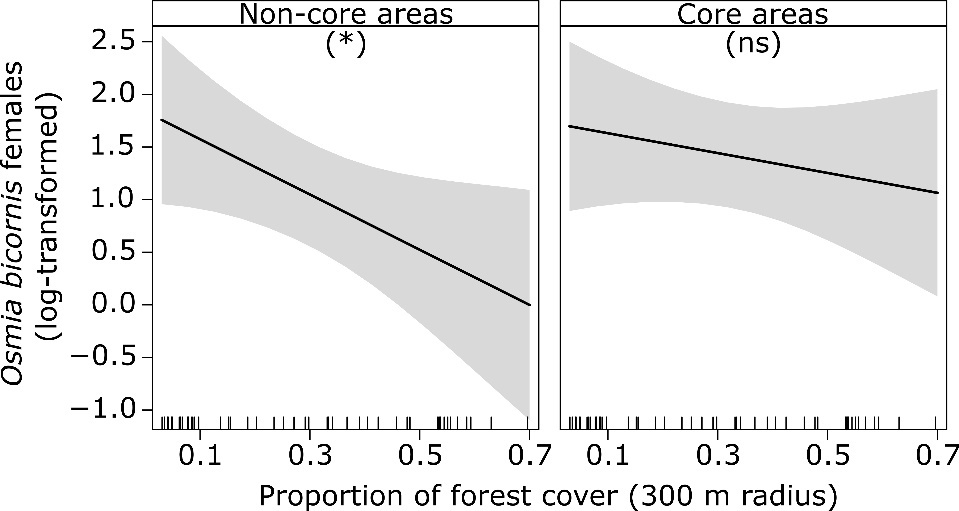


**Fig. S12** Relationships between the number of *Osmia bicornis* female offspring and the proportion of forest cover at the 300 m radius in non-CAs and CAs. Plotted lines show the predicted relationship and shaded areas indicate the 95% confidence intervals. *, P < 0.05; ns, not-significant.


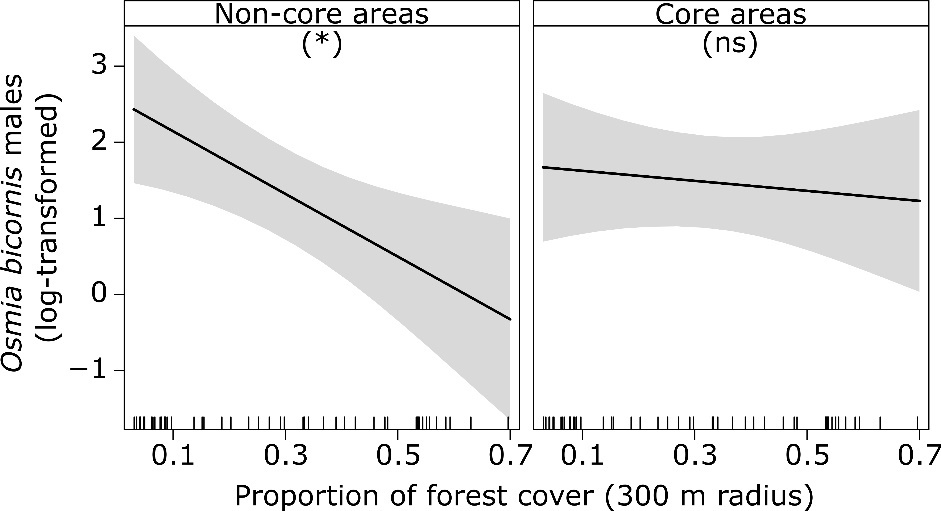


**Fig. S13** Relationships between the number of *Osmia bicornis* male offspring and the proportion of forest cover at the 300 m radius in non-CAs and CAs. Plotted lines show the predicted relationship and shaded areas indicate the 95% confidence intervals. *, P < 0.05; ns, not-significant.

**Table S4** All identified Hymenoptera species of the Günz valley (study area), including host and parasitic species.

| Identified species | | | |
| --- | --- | --- | --- |
| Bees | **Wasps** | **Parasitic bees** | **Parasitic wasps** |
| *Chelostoma florisomne* | *Allodynerus rossii* | *Coelioxys alata* | *Coelopencyrtus arenarius* |
| *Heriades truncorum* | *Ancistrocerus antilope* | *Coelioxys inermis* | *Chrysis angustula* |
| *Hylaeus difformis* | *Ancistrocerus gazella* | *Coelioxys mandibularis* | *Omalus biaccinctus* |
| *Hylaeus* sp. | *Ancistrocerus nigricornis* | *Stelis breviuscula* | *Trichrysis cyanea* |
| *Megachile alpicola* | *Ancistrocerus parietinus* |  | *Sapyga_clavicornis* |
| *Megachile centuncularis* | *Ancistrocerus trifasciatus* |  |  |
| *Megachile ligniseca* | *Discoelius zonalis* |  |  |
| *Megachile versicolor* | *Euodynerus notatus* |  |  |
| *Megachile* sp. | *Euodynerus quadrifasciatus* |  |  |
| *Osmia bicornis* | *Passaloecus borealis* |  |  |
| *Osmia caerulescens* | *Passaloecus insignis* |  |  |
| *Osmia leaiana* | *Pemphredon cf. lethifer* |  |  |
|  | *Symmorphus bifasciatus* |  |  |
|  | *Symmorphus crassicornis* |  |  |
|  | *Symmorphus gracilis* |  |  |
|  | *Symmorphus murarius* |  |  |
|  | *Trypoxylon figulus* |  |  |
